# Supplementary material
Source: publisher figshare collection journal article supplement (https://tandf.figshare.com/ndownloader/files/26240424)
Supplement: Supplementary file 1 [file 26240424]

**Supplemental Annex: Schedules of Survey Questions**

This Annex lists the full schedule of survey questions for all three surveys administered during the first national lockdown in Aotearoa New Zealand. The surveys contained a mixture of quantitative questions and open-ended qualitative questions in which respondents could freely describe their thoughts.

The analysis in this article draws on answers to the open-ended qualitative questions, which have been identified with asterisks and italicised in the schedules outlined below. We have also listed the quantitative questions in the survey so that readers can appreciate the context in which the open-ended questions were asked. However, for reasons of space – and since these answers do not directly inform our arguments in this article - we have not provided the full range of possible answers available for each of these questions.

Survey items to which respondents were able to respond are listed in the schedules with a Q – e.g. ‘Q1.1’. Survey items that did not invite a response (e.g. information slides; framing remarks) are listed in the schedules with an S, e.g. ‘S.1.1’.

Readers who would like any further information about the surveys should contact Dr Nicholas J. Long, Department of Anthropology, London School of Economics and Political Science – email N.J.Long@lse.ac.uk

**Level 4 Survey [6 – 26 April 2020]**

Q1.1 [Project Description]

Q2.1[Consent Statement – compulsory question]

Q3.1 What year were you born?

Q3.2 What is your gender?

Q3.3 Which of the following best describes your sexual orientation?

Q3.4 What is your current relationship status?

Q3.5 Which ethnicity do you identify with most?

Q3.6 What is the highest level of education you have completed?

Q3.7 Which statement best describes your current employment status?

Q3.8 Yourself included, how many people are living in your household during the lockdown?

Q3.9 Who else lives with you in your household? Select all that apply

S4.1 This section asks you to think back to the days before the coronavirus crisis had really begun. It will help us to understand what your everyday life used to be like. We will ask you some questions about your activities *between Monday 2nd March 2020 and Sunday 8th March 2020*. It doesn't matter if you can't remember the exact answers! Just give us your best guess!  
**Between Monday 2nd March 2020 and Sunday 8th March 2020...**

Q4.2 ...on how many days did you leave your home for formal education (school, university, etc)?

Q4.3 ...on how many days did you leave your home for work?

Q4.4 ...on how many days did you attend a social engagement outside your home? This could have been a one-on-one meeting with a friend, partner, or relative, or a group event such as a party

Q4.5 ...on how many days did you host a guest **inside** your home?

Q4.6 ..on .how many days did you have a phone or video call of at least 15 minutes for purposes other than work or formal education?

Q4.7 How did your social life between Monday 2nd March and Sunday 8th March compare to a typical week for you?

Q4.8 Overall, how satisfied were you with your everyday life **during the week of 2nd-8th March 2020**?

S5.1 This section will help us to understand what your everyday life is like at the moment. We will ask you some questions about your activities over the past seven days. Remember, this survey is completely confidential - so please be honest in your answers, even if you have not fully complied with government guidelines.

Q5.2 How closely would you say you have been following government guidelines for how to behave during lockdown?

Q5.3 On how many days **in the past seven days** have you left your home for formal education (school, university, etc)?

Q5.4 On how many days **in the past seven days** have you left your home for work?

Q5.5 On how many days **in the past seven days** have you attended a social engagement outside your home? This could have been a one-on-one meeting with a friend, partner, or relative, or a group event such as a party

Q5.6 On how many days **in the past seven days** have you hosted a guest inside your home?

Q5.7 On how many days **in the past seven days** have you had a phone or video call of at least 15 minutes for purposes other than work or formal education?

Q5.8 Overall, how satisfied have you been with your everyday life during the **past seven days**?

Q5.9 Overall, how satisfied do you think you will be with your everyday life during **the** **NEXT seven days**?

Q5.10 How easy are you finding it to achieve an effective work-life balance?

Q5.11 So far, has your experience of the lockdown been as good or as bad as you expected?

S6.1 Following a lockdown, social distancing measures can gradually be relaxed. There are many possible ways in which this can be done.

Q6.2 Which **three** of the following relaxation measures would lead to the biggest improvements in **your own quality of life**?

**Q6.3 If you would like to, please explain your answer*

Q6.4 Which **three** of the following relaxation measures do you think should be **priorities for the government**?

**Q6.5 If you would like to, please explain your answer*

[Survey branches. If household contains children, skip to question 8.1. If a single-person household, skip to question 12.1]

7.1 One possible way to relax social distancing is by allowing small numbers of households to socialise with each other. We would like to ask you some questions about different ways in which this could be done.

Q7.2 How different do you think your experience of the lockdown would be if your household was able to spend time with **ONE other person, provided they live alone?**
Q7.3 How different do you think your experience of the lockdown would be if your household was able to spend time with **TWO other people, provided they both live alone**? You and they would only be able to see each other, but you could spend as much time with each other as you liked.

Q7.4 How different do you think your experience of the lockdown would be if your household was able to spend time with **ONE other household, no matter how many people lived there**?

Q7.5 How different do you think your experience of the lockdown would be if your household was able to spend time with **TWO other households, no matter how many people lived there**? You and they would only be able to see each other, but you could spend as much time with each other as you liked.

**Q7.6 If you would like to add any comments regarding your answers on this page, please do so here.*

Q7.7 Imagine that your household was allowed to spend time with ONE person **who lives alone** during the lockdown. Which of the following best describes the person you would choose to spend time with?

Q7.8 Why would you not spend time with anyone who lives alone? Select all that apply.

Q7.9 Imagine that your household was allowed to spend time with **a second** person **who lives alone** during the lockdown. Which of the following best describes the second person you would choose to spend time with?

Q7.10 Imagine that your household was allowed to spend time with **one** other household during the lockdown, regardless of how many people lived in it. Which of the following best describes the household you would choose to spend time with?

Q7.11 Why would you not choose to spend time with people from another household? Select all that apply.

Q7.12 Imagine that you could also spend time with **a second** household during the lockdown, regardless of how many people lived in it. Which of the following best describes the household you would choose to spend time with?

[now move to question 17.1]

Q8.1 Some New Zealand households are allowed to have a 'buddy' to help with childcare. This could be because the child's parents are essential workers, for example, or because the child has complex care needs. Does your household qualify for a childcare 'buddy'?

[if 8.1 = no, revert to question 7.1]

Q8.2 Do you currently have a childcare 'buddy'?

[survey branches; if 8.2 = yes, move to 11.1]

Q9.1 Why do you not (yet) have a buddy? Select all that apply.

Q9.2 How likely do you think it is that you will get a buddy before the lockdown ends?

Q9.3 How different do you think your experience of the lockdown would be if the NZ government had **not** allowed you the chance to have a buddy?

S10.1 One possible way to relax social distancing is by allowing small numbers of households to socialise with each other. In this final part of the survey, we would like to ask you some questions about this possibility.

Q10.2 How different do you think your experience of the lockdown would be if, in addition to a childcare buddy, your household was also able to spend time with **ONE other person, provided they live alone?**

Q10.3 How different do you think your experience of the lockdown would be if, in addition to a childcare buddy, your household was able to spend time with **ONE other household, no matter how many people lived there**?

**Q10.4 If you would like to add any comments regarding your answers on this page, please do so here.*

Q10.5 Imagine that, in addition to a childcare buddy, your household was allowed to spend time with ONE person **who lives alone** during the lockdown. Which of the following best describes the person you would choose to spend time with?

Q10.6 Why would you not spend time with anyone who lives alone? Select all that apply.

Q10.7 Imagine that, in addition to a childcare buddy, your household was allowed to spend time with **one** other household during the lockdown, regardless of how many people lived in it. Which of the following best describes the household you would choose to spend time with?

Q10.8 Why would you not choose to spend time with people from another household? Select all that apply.

[move to 17.1]

Q11.1 Which of the following best describes your current buddy?

**Q11.2 What led you to choose this person?*

Q11.3 Did you ask anybody else to be a buddy before settling on your current buddy?

Q11.4 Overall, how did you find the experience of settling on a buddy?

Q11.5 How different do you think your experience of the lockdown would be if the NZ government had **not** allowed you the chance to have a buddy?

Q11.6 How different do you think your experience of the lockdown would be if the NZ government had allowed you the chance to have a **second** buddy?

Q11.7 If you were able to have a second buddy, who would you choose?

Q11.8 Why would you not choose to have a second buddy? Select all that apply.

[move to 17.1]

Q12.1 In New Zealand, people who live alone can sometimes pair up with one other person who lives alone to be 'buddies' during lockdown. They can spend as much time as they like with each other, but only with each other - not with anyone else. Have you paired up with a 'buddy'?

[if no, skip to 14.1]

Q13.1 Which of the following best describes the person you have chosen as your buddy?

Q13.2 What led you to choose this person?

Q13.3 Did you ask anybody else to be a buddy before settling on your current buddy?

Q13.4 Was there anybody else who asked you to be a buddy before or after you chose your current buddy?

Q13.5 Why did you decline their offer? Select all that apply.

Q13.6 Overall, how did you find the experience of settling on a buddy?

[move to 15.1]

Q14.1 Why have you not (yet) paired up with a buddy? Select all that apply.

Q14.2 How likely do you think it is that you will pair up with a buddy before the lockdown ends

Q15.1 How different do you think your experience of the lockdown would be if the NZ government had **not** allowed you the chance to have a buddy?

Q15.2 One possible way to relax social distancing is by allowing small numbers of households to socialise with each other. In this part of the survey, we would like to ask you some questions about this possibility.

Q15.3 How different do you think your experience of the lockdown would be if you were allowed to have **TWO buddies, provided they both live alone**? The three of you could only see each other, but you could spend as much time with each other as you liked.

Q15.4 How different do you think your experience of the lockdown would be if you were allowed to spend your free time with **ONE other household, no matter how many people lived there**?

Q15.5 How different do you think your experience of the lockdown would be if you were allowed to spend your free time with **TWO other households, no matter how many people lived there**? You and they would only be able to see each other, but you could spend as much time with each other as you liked.

**Q15.6 If you would like to add any comments regarding your answers on this page, please do so here.*

Q16.1 Imagine that you was allowed to spend time with a second buddy **who also lives alone** during the lockdown. Which of the following best describes the person you would choose to spend time with?

Q16.2 Why would you not choose to have a second buddy? Select all that apply.

Q16.3 Imagine that, instead of a buddy, you were allowed to spend time with **one** other household during the lockdown, **regardless of how many people live in it.** Which of the following best describes the household you would choose to spend time with?

Q16.4 Why would you not want to spend time with another household? Select all that apply. Q16.5 Imagine that you could also spend time with **a second** household during the lockdown, **regardless of how many people live in it**. Which of the following best describes the household you would choose to spend time with?

[before 20th April 2020, the survey then moved straight to 18.1. Following Jacinda Ardern’s announcements about Level 3, an additional block of questions was added.]

S17.1 On 28th April 2020, New Zealand is due to transition to 'Level 3' of lockdown. In this final part of the survey, we would like to ask you some questions about this.

Q17.2 Do you think New Zealand is moving to Level 3 **at the right time**?

Q17.3 Under Level 3, extra forms of exercise and recreation will be permitted, such as swimming, surfing, tramping and day walks. Do you think you will do any of these?

Q17.4 How often did you do such activities before the pandemic?

Q17.5 Do you think you will send any of your children to school once New Zealand is at Level 3? This could be every day, or just for a few days now and then.

Q17.6 Why are you considering sending your child or children to school during Level 3? (select all that apply)

Q17.7 Why are you considering not sending your child or children to school during Level 3? (select all that apply)

Q17.8 Do you think you will return to work in your usual workplace during Level 3?

Q17.9 What are your thoughts and feelings about returning to work? Please select all that apply.

Q17.10 In Level 3, you will be able to slightly extend your bubble to reconnect with close family / whānau, or bring in caregivers, or support isolated people. Do you think you will do this? **Q17.11 If you did extend your bubble, who would you add to it?*

**Q18.1 You're almost at the end of the survey. Before you finish, is there anything more you would like to tell us about your experiences of lockdown?*

Q19.1 [Option given to volunteer for future research].

Level 3 survey

Q1.1 [Project Description]

Q2.1[Consent Statement]

S3.1 Let's start with some questions about you.

Q3.2 What year were you born?

Q3.3 What is your gender?

Q3.4 Which of the following best describes your sexual orientation?

Q3.5 What is your current relationship status?

Q3.6 Which ethnicity do you identify with most?

Q3.7 What is the highest level of education you have completed?

Q3.8 Which statement best describes your current employment status?

Q3.9 It would help our research to know which part of the country you live in. If you feel comfortable doing so, please share your city, district, or postal code

Q3.10 Wherever you live, do you consider yourself to be a 'rural' person, an 'urban' person, or something in between?

S4.1 In this section, we will ask you some general questions about your quality of life and your experience of the pandemic so far.

S4.2 Think back to the start of March, before the pandemic had really begun.

Q4.3 Overall, how satisfied were you with your everyday life**at the beginning of March?**

Q4.4 Was your experience of the Level 4 lockdown as you expected?

Q4.5 How closely would you say you have been following government guidelines for how to behave during lockdown?

Q4.6 Overall, how satisfied have you been with your everyday life during the **past seven days**?

Q4.7 Overall, how satisfied do you think you will be with your everyday life during **the** **NEXT seven days**?

Q4.8 Has your experience of Level 3 been as you expected?

Q4.9 Does your work require you to spend time outside your home?

Q4.10 What is your job?

Q4.11 How do you feel about spending time outside your home for work?

S5.1 Right now, how serious a threat do you think the coronavirus poses...

Q5.2 ...to your own personal health?

Q5.3 ...to the health of your friends and family?

Q5.4 ...to your household finances?

Q5.5 ...to New Zealand as a whole?

Q5.6 Do you think New Zealand has moved to Level 3 **at the right time**?

Q5.7 Which **three** of the following lockdown relaxation measures have, or would have, led to the biggest improvements in **your own quality of life?**

**Q5.8 If you would like to, please explain your answer*

Q5.9 Which **three** of the following relaxation measures do you think should have been **priorities for the government**?

**Q5.10 If you would like to, please explain your answer*

S6.1 How much do you agree with the following statements:

Q6.2 Government guidance on what is and what is not permitted in Level 3 has been clear

Q6.3 I am confident that most New Zealanders will keep their bubbles exclusive during Level 3

Q6.4 I am confident that my (expanded) bubble will stay exclusive during Level 3

Q6.5 I often find myself tempted to spend time with people outside of my (expanded) bubble

Q6.6 I have been able to stay at a safe distance from other people whilst doing my job

Q6.7 Now that we are in Level 3, it doesn't matter too much if people occasionally break social distancing rules

Q6.8 In the days since Level 3 began (i.e. since Tuesday 28th April), has anyone from outside your (expanded) bubble attempted to get you to spend time with them?

Q6.9 In the **past seven days**, has anyone from outside your (expanded) bubble attempted to get you to spend time with them?

Q6.10 We would like to know more about this. Don't worry, your answers will remain strictly confidential! Did you end up spending time with them?

** Q6.11 What happened? Please tell us as much as you can; it will help us to find ways of supporting people in similar situations.*

Q6.12 As far as you know, has anybody **that you know personally** been spending time with people from outside their (expanded) bubble since Level 3 began?

Q6.13 As far as you know, has anybody **that you know personally** been spending time with people from outside their (expanded) bubble at any point **in the last seven days**?

Q6.14 Was this for an approved reason, e.g. going to work, seeking urgent medical care, etc?

Q6.15 How did you discover that they had spent time with people outside their (expanded) bubble? Select all that apply.

**Q6.16 As far as you know, why did they 'burst' their bubble in this way? Please tell us in as much detail as possible. Your answer will be completely confidential and nobody will get into any trouble.*

S7.1 We would now like to ask you some questions about your bubble. This is to help us understand how the bubble system is working in New Zealand, and to see whether it could be useful for people living in other countries.

Q7.2 Under Level 4, how many people **other than you** were in your bubble?

Q7.3 Please describe each bubble member's relationship to you.

S8.1 Now that New Zealand is at Level 3, New Zealanders are allowed to expand their bubble slightly - for example, to reconnect with close family/whānau, bring in caregivers, or support isolated people.

Q8.2 Has your bubble expanded under Level 3?

Q8.3 When you expanded your bubble, how many pre-existing bubbles did you merge with your own?

Q9.1 How many people are in each pre-existing bubble you have joined with?

Q9.2 Please describe each person's relationship to you

[sections 10 to 18 ask the same questions as section 9; but with different layouts depending on how many bubbles the respondent had merged with].

Q19.1 How easy or difficult was it to decide whether to expand your bubble?

Q19.2 How easy or difficult was it to decide who to include in your expanded bubble?

Q19.3 Which of the following best describes the bubble arrangement you are living in right now?

Q19.4 If Level 3 were to continue for several months, how likely is it that you would add more people to your bubble?

Q19.5 If Level 3 were to continue for several months, how likely is it that you would want to change who was in your bubble from time to time?

Q19.6 Have you been turned away by any bubbles that you hoped to join?

Q19.7 How did this make you feel?

Q19.8 Have you had to turn down anyone who had hoped to join your bubble?

Q19.9 As far as you know, how did this make them feel

**Q19.10 Who did you turn down, and why?*

S20.1 We would now like to ask some questions about how the lockdown has been policed. To what extent do you agree with the following statements...

Q20.2 ....it was right that the police had the power to stop people during Level 4 and enforce the Level 4 rules

Q20.3 ....it is right that the police have the power to stop people during Level 3 and enforce the Level 3 rules

Q20.4 ....the police have been too heavy-handed during the lockdown

Q20.5 Have you been stopped by the police at any point during lockdown? Select all that apply.

Q20.6 Under what circumstances did the police stop you? Select all that apply.

Q20.7 Did any of the following occur? Select all that apply.

Q20.8 To what extent do you agree with the following statements...

Q20.9 ...the police were polite

Q20.10 ...the police appeared stressed

Q20.11 ...I felt the police were trying to educate the public, rather than punish the public

Q20.12 ...I felt encouraged to comply with the rules

Q20.13 ...I felt I had been stopped unfairly because of how I look, or where I live

Q20.14 ...overall, the officers did a good job

Q20.15 Have any other New Zealanders attempted to police, discipline, or scold you during the lockdown?

**Q20.16 Please tell us about what happened*

**Q21.1 In order to help us get a better sense of what life is like under lockdown during Level 3, please tell us what you have been doing over* ***the past 24 hours****.*

Q22.1 [Option given to volunteer for future research].

**Level 2 Survey**

Q1.1 [Project Description]

Q1.2 [Consent Statement]

S1.3 Let's start with some questions about you.

Q1.4 What year were you born?

Q1.5 What is your gender?

Q1.6 Which of the following best describes your sexual orientation?

Q1.7 What is your current relationship status?

Q1.8 Which ethnicity do you identify with most?

Q1.9 What is the highest level of education you have completed?

Q1.10 Which statement best describes your current employment status?

Q1.11 It would help our research to know which part of the country you live in. If you feel comfortable doing so, please share your city, district, or postal code.

Q1.12 Wherever you live, do you consider yourself to be a 'rural' person, an 'urban' person, or something in between?

Q1.13 What is your job?

Q1.14 Where do you do your work? Select all that apply.

S2.1 We would like to start the survey by asking some questions about your general attitudes and experiences. There are no right or wrong answers, so please be honest, and answer however feels right to you!

Q2.2 Overall, how satisfied with your life have you been over **the past seven days**?

Q2.3 Overall, how satisfied were you with your life when New Zealand was at Level 4?

Q2.4 Overall, how satisfied were you with your life when New Zealand was at Level 3?

Q2.5 Overall, how satisfied were you with your life **at the start of March 2020** - i.e. before the coronavirus pandemic began?

Q2.6 How closely have you been following the government's social distancing guidelines for Level 2?

Q2.7 How thoroughly have you been keeping records of your movements and contacts over the last seven days?

Q2.8 So far, has life at Level 2 been as you expected?

S3.1 At this moment in time, how serious a threat do you think the coronavirus poses...

Q3.2 ...to your own personal health over the next month?

Q3.3 ...to the health of your friends and family in New Zealand over the next month?

Q3.4 ...to your household finances over the next month?

Q3.5 ...to New Zealand as a whole over the next month?

Q3.6 Do you think New Zealand moved to Level 2 **at the right time**?

Q3.7 Do you feel you have been able to stay at a safe distance from other people whilst doing your job?

**Q3.8 Please explain your answer*

S4.1 At this moment in time, how comfortable would you feel about doing each of the following...

Q4.2 ...going to the beach

Q4.3 ...going to the cinema

Q4.4 ...going to a supermarket

Q4.5 ...buying clothes in a clothes store

Q4.7 ...meeting a group of 5 friends outdoors

Q4.8 ...attending a wedding

Q4.9 ...having dinner in a restaurant

Q4.10 ...travelling on public transport in your local area

Q4.11 ...travelling to Europe

**Q4.12 If you would like to add any comments in relation to your answers, please do so here*

Q4.13 Do you think that New Zealand should move to Level 1 in the next 7 days?

**Q4.14 If you would like to, please explain your answer*

S5.1 We'd now like to ask some questions about your social relationships during and after lockdown.

Q5.2 Did you find that the lockdown led to you becoming **much closer** to anyone than you had been previously?

**Q5.3 Please tell us who you became closer to, and why.*

**Q5.4 How, if at all, has the move to Level 2 affected your relationship with the people you became closer to during lockdown?*

Q5.5 Did you find that the lockdown led to you **drifting apart** from anyone?

**Q5.6 Please tell us who you drifted apart from, and why.*

**Q5.7 How, if at all, has the move to Level 2 affected your relationship with the people you drifted apart from during lockdown?*

Q6.1 Under Level 4, how many people **other than you** were in your bubble?

Q6.2 How easy or difficult was it to decide whether to expand your bubble when New Zealand moved to Level 3?

Q6.3 Did your bubble expand when New Zealand moved to Level 3?

Q6.4 In the days since New Zealand has been at Level 2, how often have you spent time with people who were not part of your bubble?

Q7.1 When you expanded your bubble, how many pre-existing bubbles merged with your own?

Q7.2 How easy or difficult was it to decide who to include in your expanded bubble?

**Q7.3 Who was included in your expanded bubble, and why?*

Q8.1 How confident are you that your bubble stayed exclusive during Level 4?

Q8.2 How confident are you that your bubble stayed exclusive during Level 3?

**Q8.3 You indicated that you are not very confident that your bubble stayed exclusive during Level 4. Why is this?*

**Q8.4 You indicated that you are not very confident that your bubble stayed exclusive during Level 3. Why is this?*

Q9.1 Were you turned away by any bubbles that you hoped to join? Select all that apply.

Q9.2 Did you have to turn down anyone who had hoped to join your bubble? Select all that apply.

**Q9.3 You indicated that you were turned away by one or more bubbles you hoped to join. What happened?*

**Q9.4 Have you spent any time with the people who turned you away since New Zealand has been at Level 2? What is the current state of your relationship with them?*

**Q9.5 You indicated that you turned one or more people away from your bubble. What happened?*

**Q9.6 Have you spent any time with the people you turned away since New Zealand has been at Level 2? What is the current state of your relationship with them?*

Q9.7 There are many different ways of easing a lockdown. Rather than allowing people to expand their bubbles, some countries are allowing citizens to hold socially distanced gatherings with friends and family outdoors.

Q9.8 In retrospect, which policy would have been more beneficial **to you personally** when New Zealand was at Level 3?

**Q9.9 Please explain your answer.*

Q9.10 In retrospect, which policy do you think New Zealand should have adopted **for the country as a whole** at Level 3?

**Q9.11 Please explain your answer*

S10.1 We would now like to ask some questions about policing during the coronavirus pandemic. To what extent do you agree with the following statements...

Q10.2 ....it was right that the police had the power to stop people during Level 4 and enforce the Level 4 rules

Q10.3 ....it was right that the police had the power to stop people during Level 3 and enforce the Level 3 rules

Q10.4 ....it is right that police have the power to search premises without a warrant in order to enforce the Level 2 rules

Q10.5 ....the police have been too heavy-handed during the lockdown

Q10.6 Have you been stopped by the police at any point during the pandemic? Select all that apply.

Q11.1 Under what circumstances did the police stop you? Select all that apply.

Q11.2 Did any of the following occur? Select all that apply.

Q11.3 To what extent do you agree with the following statements...

Q11.4 ...the police were polite

Q11.5 ...the police appeared stressed

Q11.6 ...I felt the police were trying to educate the public, rather than punish the public

Q11.7 ...I felt encouraged to comply with the rules

Q11.8 ...I felt I had been stopped unfairly because of how I look, or where I live

Q11.9 ...overall, the officers did a good job

**Q11.10 Is there anything more you would like to tell us about what happened?*

Q12.1 Have any other New Zealanders attempted to police, discipline, or scold you during the pandemic? Select all that apply.

**Q12.2 Please tell us about what happened*

Q13.1 How much has living through the period of lockdown changed the way you see yourself as a person?

Q13.2 How much has living through the period of lockdown changed what you see as your priorities?

Q13.3 How different do you think your life post-lockdown will be, compared to the life you led before the pandemic began?

**Q13.4 Please explain your answers*

**Q14.1 You're almost at the end of the survey! Before you finish, is there anything more you would like to tell us about your experiences of life at Level 2?*

Q15.1 [Option given to volunteer for future research].
